# Supplementary material for: Inflammatory-Related P62 Triggers Malignant Transformation of Mesenchymal Stem Cells through the Cascade of CUDR-CTCF-IGFII-RAS Signaling
Source: PubMed Central journal article supplement (PMC5992448; doi:10.1016/j.omtn.2018.03.002), 2018-03-09
Supplement: mmc1.pdf [file mmc1.pdf]

OMTN, Volume 11

## **Supplemental Information**

### **Inflammatory-Related P62 Triggers Malignant Transformation of Mesenchymal Stem Cells through the Cascade of CUDR-CTCF-IGFII-RAS Signaling**

**Xiaoru Xin, Chen Wang, Zhuojia Lin, Jie Xu, Yanan Lu, Qiuyu Meng, Xiaonan Li, Yuxin Yang, Qidi Zheng, Xin Gui, Tianming Li, Hu Pu, Wujun Xiong, Jiao Li, Song Jia, and Dongdong Lu**

**FigureS1**

**A**

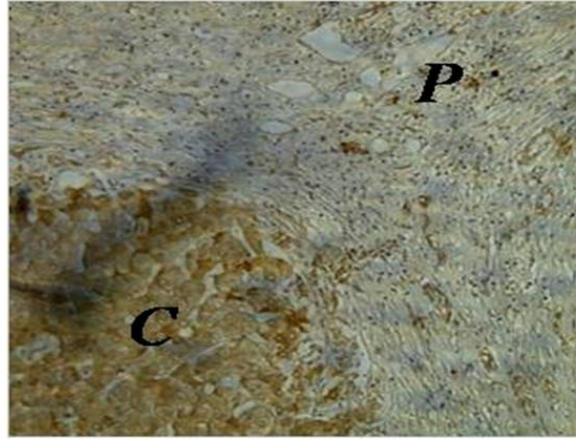

**B**

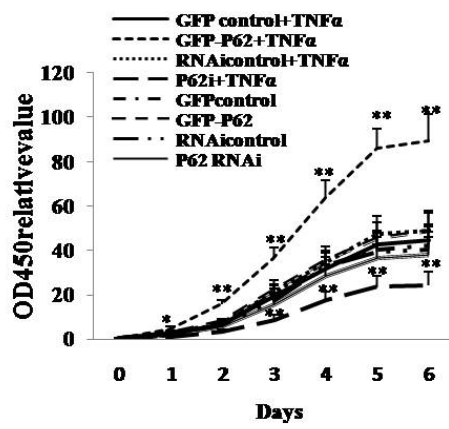

**C**

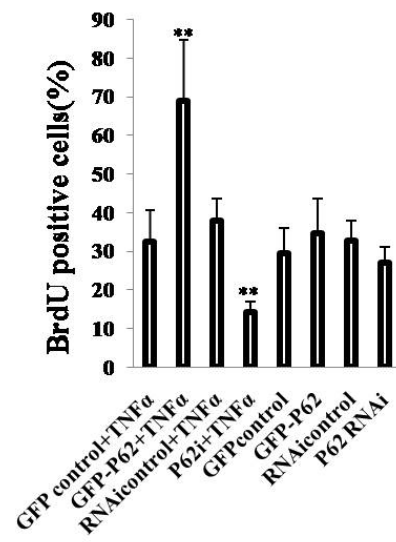

**FigureS2**

**A**

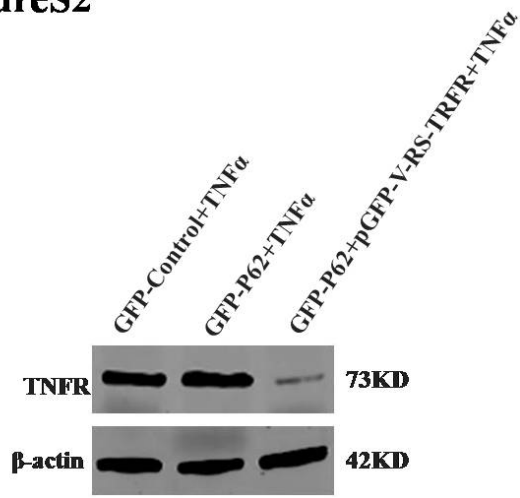

**B**

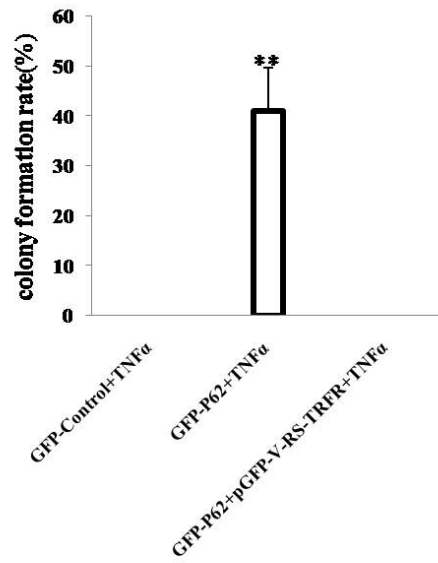

**C**

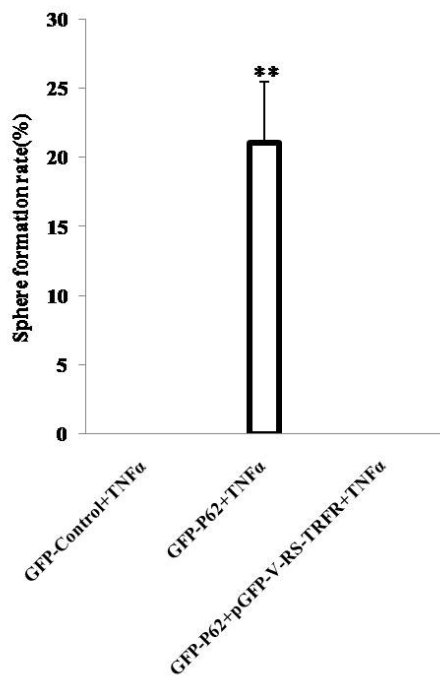

**D**

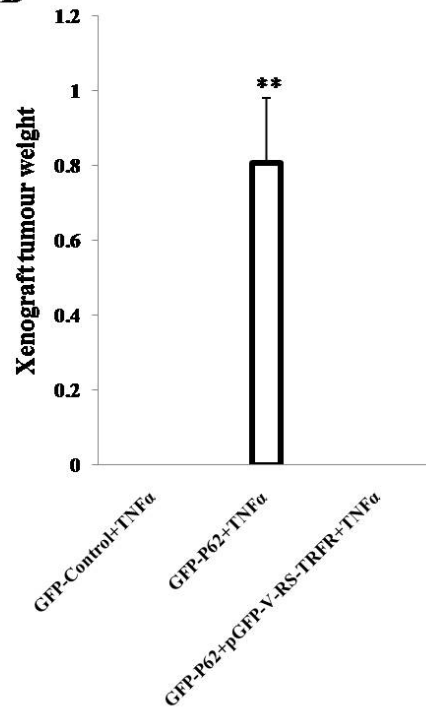

**FigureS3**

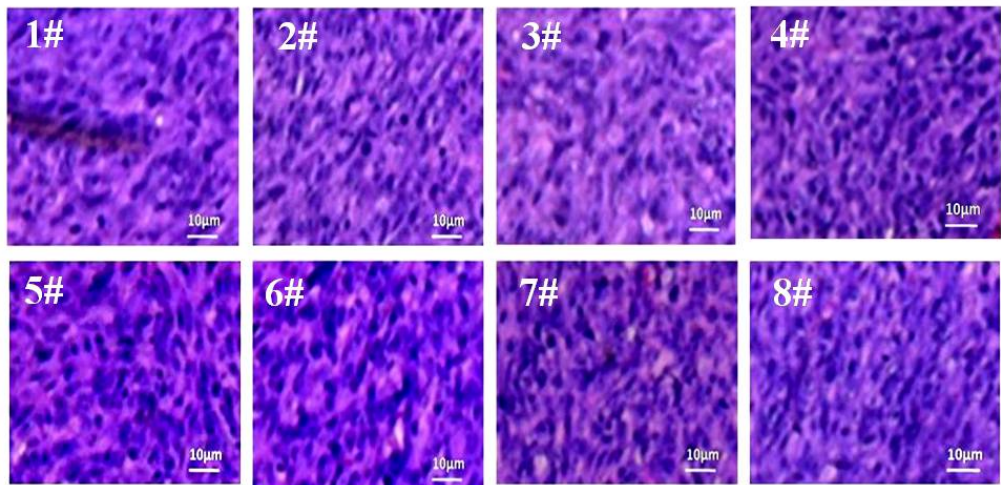

**FigureS4**

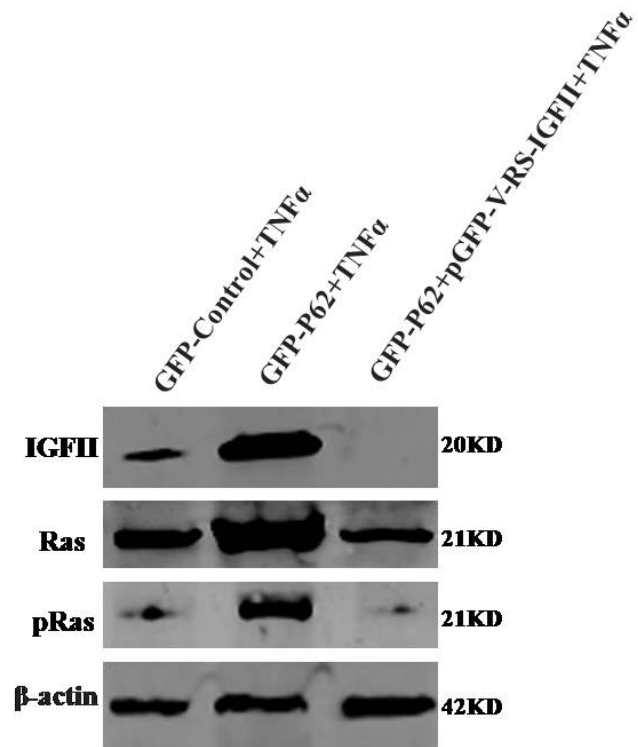

**FigureS5**

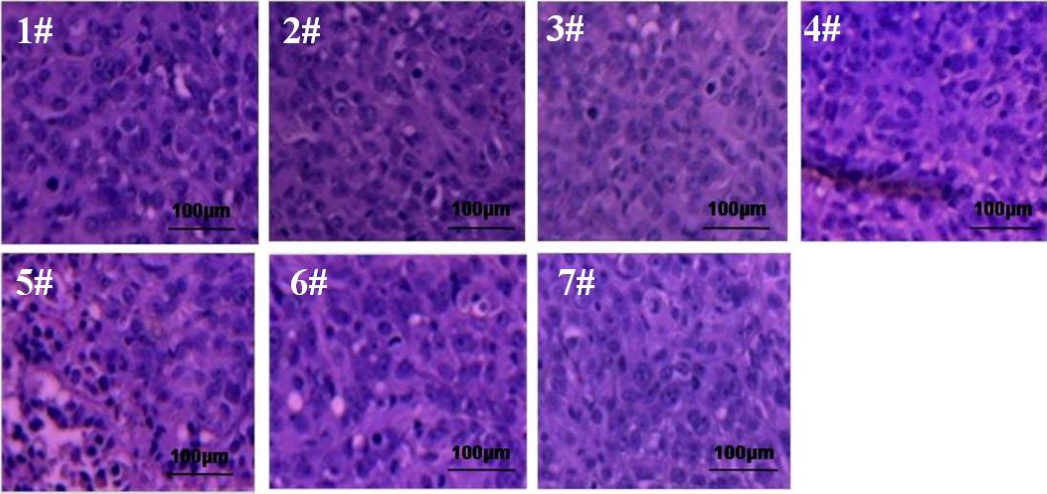

**FigureS6**

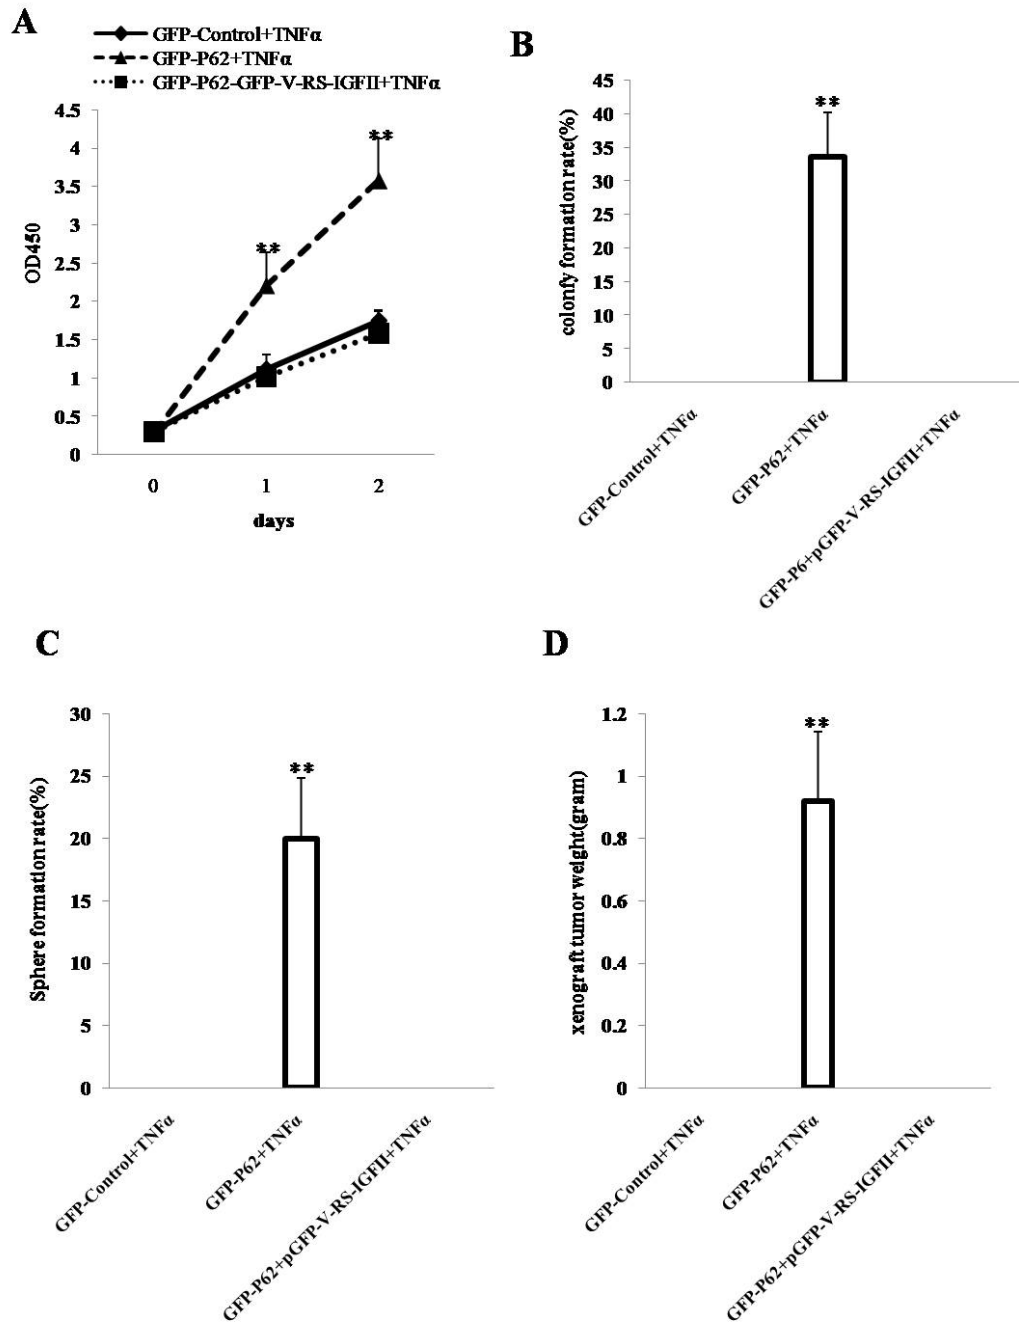

# FigureS7

A

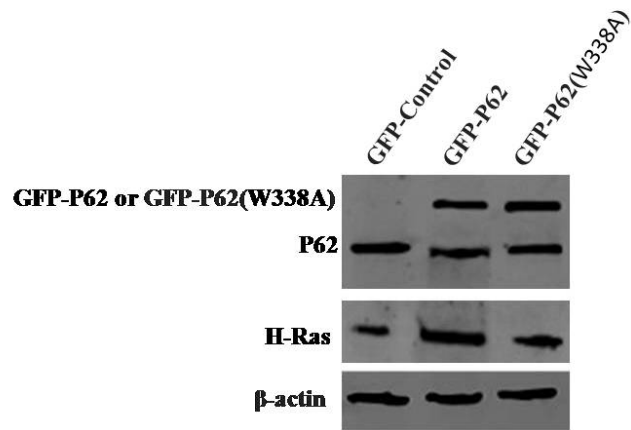

B

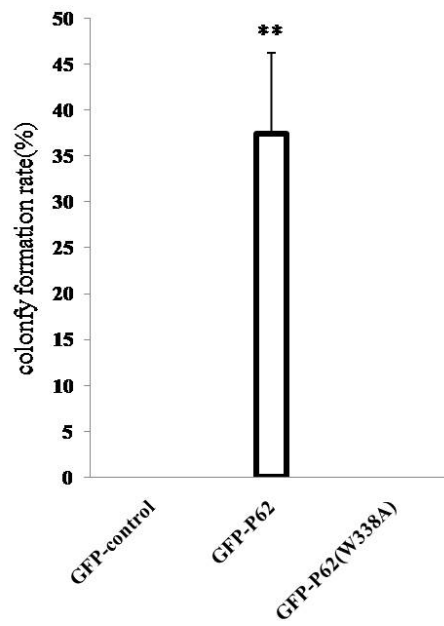

C

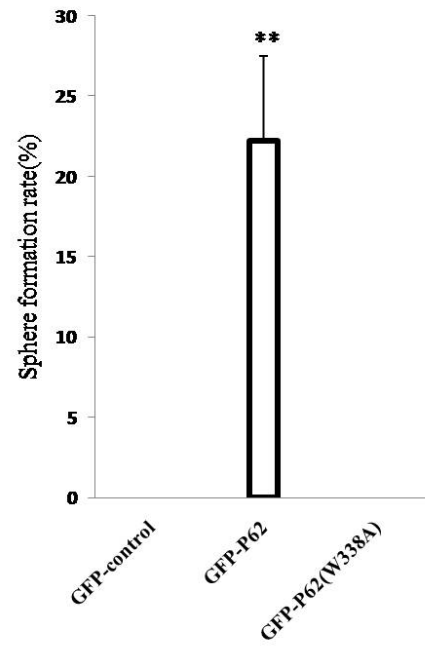



## FIGURE LEGENDS

**FigureS1:** A.Immunohistochemical staining with anti-CEA(human) (DAB staining, original magnification×100). P, paracancerous liver tissue; C, cancer tissue. **B.** cells growth assay using CCK8. Each value was presented as mean±standard error of the mean (SEM) (Student's t-test.C. S phase cells assay using BrdU. Each value was presented as mean±standard error of the mean (SEM) (Student's t-test).

**FigureS2:** TNFR knockdown abrogated the functions of P62 in human mesenchymal stem cells malignant transformation *in vitro* and *in vivo*. **A.**The Western blotting analysis with anti-TNFR in these human mesenchymal stem cells indicated in *upper* .β-actin as internal control. **B.** cells soft agar colony formation assay in these human mesenchymal stem cells , including GFP-Control+TNFα ,GFP-P62+TNFα , GFP-P62+pGFP-V-RS-TNFR+TNFα. **C.** Cells sphere formation ability. **D.** Tumorigenesis test *in vivo* .The wet weight of each tumor was determined for each mouse. Each value was presented as mean±standard error of the mean (SEM).

**FigureS3:** A portion of each tumor was fixed in 4% paraformaldehyde and embedded in paraffin for histological hematoxylin-eosin(HE) staining. (original magnification×100).

**FigureS4:** Western blotting with anti-IGFII ,anti- Ras and anti-pRas in the TNFα treated mesenchymal stem cells,including GFP-Control+TNFα ,GFP-P62+TNFα , GFP-P62 +pGFP-V-RS-IGFIIR+TNFα. β-actin was used as an internal control.

**FigureS5:** A portion of each tumor was fixed in 4% paraformaldehyde and embedded in paraffin for histological hematoxylin-eosin(HE) staining.

**FigureS6:** IGFII knockdown abrogated the functions of P62 in human mesenchymal stem cells malignant transformation in *vitro* and in *vivo*. **A.**The cell growth assay in these human mesenchymal stem cells, including GFP-Control+TNF $\alpha$  ,GFP-P62+TNF $\alpha$  , GFP-P62+pGFP-V-RS-IGFII+TNF $\alpha$ . **B.** cells soft agar colony formation assay. **C.** Cells sphere formation ability. **D.**Tumorigenesis test *in vivo* .The wet weight of each tumor was determined for each mouse. Each value was presented as mean $\pm$ standard error of the mean (SEM).

**FigureS7:** mutantP62 (W338A) lacks the functions of wild P62 in human mesenchymal stem cells . **A.** cells soft agar colony formation assay in these human mesenchymal stem cells, including pCMV6-AC-GFP plus TNF $\alpha$  , pCMV6-AC-GFP-P62 plus TNF $\alpha$  , pCMV6-AC-GFP- P62(W338A) plus TNF $\alpha$ . **B.** Cells sphere formation ability in these human mesenchymal stem cells, including pCMV6-AC-GFP plus TNF $\alpha$  , pCMV6-AC-GFP-P62 plus TNF $\alpha$  , pCMV6-AC-GFP-P62(W338A) plus TNF $\alpha$ .
